# Supplementary material
Source: publisher figshare collection journal article supplement (https://sage.figshare.com/ndownloader/files/18716072)
Supplement: Supplementary file 1 [file 18716072]

# Supplementary material

**Appendix Table 1:** Probability of relapse (both locoregional and distant)

|         | IA        |              | IB        |             | IIA       |              |           |             | III       |              |           |             | III tr    |              | Systemic relapse for patients with a locoregional relapse |             |
|---------|-----------|--------------|-----------|-------------|-----------|--------------|-----------|-------------|-----------|--------------|-----------|-------------|-----------|--------------|-----------------------------------------------------------|-------------|
|         | % Relapse | Probabi lity | % Relapse | Probability | % Relapse | Probabil ity | % Relapse | Probability | % Relapse | Probabili ty | % Relapse | Probability | % Relapse | Probabili ty | % Relapse                                                 | Probability |
| 1-year  | 0.0       | 0.000        | 5.0       | 0.050       | 25.0      | 0.250        | 25.0      | 0.250       | 55.0      | 0.250        | 53.0      | 0.530       | 72.0      | 0.720        | 42.0                                                      | 0.445       |
| 5-year  | 6.0       | 0.017        | 22.9      | 0.059       | 44.9      | 0.090        | 60.8      | 0.215       | 79.0      | 0.303        | 100.0     | 0.758       | 100.0     | 0.588        | 100.0                                                     | 0.445       |
| 10-year | 7.5       | 0.004        | 29.5      | 0.021       | 49.9      | 0.023        | 65.5      | 0.033       | 85.7      | 0.167        | 100.0     | NA          | 100.0     | NA           | 100.0                                                     | NA          |
| 15-year | 11.0      | 0.009        | 34.1      | 0.017       | 52.1      | 0.010        | 67.8      | 0.022       | 85.7      | 0.000        | 100.0     | NA          | 100.0     | NA           | 100.0                                                     | NA          |
| 20-year | 13.5      | 0.007        | 34.1      | 0.000       | 60.7      | 0.060        | 67.8      | 0.000       | 89.3      | 0.242        | 100.0     | NA          | 100.0     | NA           | 100.0                                                     | NA          |

Source: Table 3, Bernengo <sup>26</sup>; Figure 1, Romano <sup>27</sup>. Annual probabilities were interpolated between 1 to 5 years, 5 to 10 years, 10 to 15 years and 15 to 20 years.

**Appendix Table 2:** Stage-specific probabilities for the site of first relapse.

|           | Locoregional relapse | Distant relapse | Source                          |
|-----------|----------------------|-----------------|---------------------------------|
| Stage I   | 0.847                | 0.153           | Table 2, Bernengo <sup>26</sup> |
| Stage II  | 0.865                | 0.135           |                                 |
| Stage III | 0.490                | 0.510           | Table 2, Romano <sup>27</sup>   |

Sites of first relapse for stages I and II were obtained from the total number of satellite/in-transit nodes and relapses in soft tissue and viscera.

**Appendix Table 3:** Medical-therapy specific probabilities of first relapse.

|         | Dabrafenib +<br>Trametinib |             | Vemurafenib +<br>Cobimetinib |             | Nivolumab |             | Pembrolizumab |             |
|---------|----------------------------|-------------|------------------------------|-------------|-----------|-------------|---------------|-------------|
|         | %                          | Probability | %                            | Probability | %         | Probability | %             | Probability |
| 1-year  | 51.0                       | 0.510       | 53.0                         | 0.530       | 59.0      | 0.590       | 48.0          | 0.480       |
| 5-year  | 100.0                      | 0.751       | 100.0                        | 0.441       | 100.0     | 0.307       | 100.0         | 0.689       |
| 10-year | 100.0                      | NA          | 100.0                        | NA          | 100.0     | NA          | 100.0         | NA          |
| 15-year | 100.0                      | NA          | 100.0                        | NA          | 100.0     | NA          | 100.0         | NA          |
| 20-year | 100.0                      | NA          | 100.0                        | NA          | 100.0     | NA          | 100.0         | NA          |

**Appendix Table 4:** Medical-therapy-specific probabilities of death due to melanoma.

|         | Dabrafenib +<br>Trametinib |             | Vemurafenib +<br>Cobimetinib |             | Nivolumab |             | Pembrolizumab |             |
|---------|----------------------------|-------------|------------------------------|-------------|-----------|-------------|---------------|-------------|
|         | %                          | Probability | %                            | Probability | %         | Probability | %             | Probability |
| 1-year  | 27.0                       | 0.270       | 25.0                         | 0.250       | 27.0      | 0.270       | 26.7          | 0.267       |
| 5-year  | 95.4                       | 0.206       | 95.4                         | 0.206       | 95.4      | 0.206       | 95.4          | 0.206       |
| 10-year | 100.0                      | 0.206       | 100.0                        | 0.206       | 100.0     | 0.206       | 100.0         | 0.206       |
| 15-year | 100.0                      | NA          | 100.0                        | NA          | 100.0     | NA          | 100.0         | NA          |
| 20-year | 100.0                      | NA          | 100.0                        | NA          | 100.0     | NA          | 100.0         | NA          |

**Appendix Table 5:** Stage at diagnosis probabilities.

|            | Melanoma not<br>detected by<br>screening <sup>a</sup><br>(%) | Parameters of the<br>Dirichlet<br>distribution | True positive on<br>screening <sup>b</sup><br>(%) | Parameters of the<br>Dirichlet<br>distribution |
|------------|--------------------------------------------------------------|------------------------------------------------|---------------------------------------------------|------------------------------------------------|
| Stage 0    | 21.60                                                        | 367                                            | 30.36                                             | 516                                            |
| Stage I    | 53.75                                                        | 914                                            | 55.42                                             | 942                                            |
| Stage II   | 11.30                                                        | 192                                            | 4.80                                              | 82                                             |
| Stage III  | 6.16                                                         | 105                                            | 4.00                                              | 68                                             |
| Stage IV   | 1.71                                                         | 29                                             | 1.53                                              | 26                                             |
| Regression | 5.48                                                         | 93                                             | 3.89                                              | 66                                             |

<sup>a</sup> Personal communication from the Veneto Cancer Registry. Applied to the no-screening branch as well as to patients in the screening branch who failed to attend or were false negative cases.

<sup>b</sup> Probabilities are obtained based on the per cent of relative variation observed before and after implementing the SCREEN project in Germany.<sup>20</sup>

**Appendix Table 6:** Screening costs.

|                                             | Unit cost (€) | Unit of measurement for a hypothetical 100,000 target population <sup>a</sup> | Total cost (€) |
|---------------------------------------------|---------------|-------------------------------------------------------------------------------|----------------|
| Mail invitation                             | 0.10          | 100,000 people                                                                | 10,000         |
| Remuneration for GP trainers per hour       | 100.00        | 9.2 hours <sup>b</sup>                                                        | 921            |
| Out-of-hours service per hour               | 32.00         | 95.7 hours <sup>c</sup>                                                       | 3,061          |
| Total-body-skin-examination by GPs          | 15.00         | 19,000 examination                                                            | 285,000        |
| Dermatologist examination                   | 20.50         | 3,175 examination                                                             | 65,086         |
| Skin punch biopsy for melanoma              | 27.60         | 5.3 biopsies <sup>d</sup>                                                     | 146            |
| Excisional skin biopsy for primary melanoma | 39.05         | 206.5 biopsies                                                                | 8,062          |
| <b>Total cost (€)</b>                       |               |                                                                               | <b>372,277</b> |

<sup>a</sup> Point estimates based on the hypotheses described in the section 'Screening strategy' and reported in Table 1.

<sup>b</sup> 8-hour course for every 30 GPs (34.5 GPs per 100,000 target population).

<sup>c</sup> 34.5 GPs per 100,000 target population. 12-hour shift every 4.33 (6,500/1,500) GPs. 6,500 and 1,500 are the mean numbers of patients cared for by out-of-hours doctors and GPs, respectively.

<sup>d</sup> Total number of biopsies: 212 (see Table 1). Punch and excisional biopsies account for 2.5% and 97.5% of total biopsies, respectively (source: Buja et al. <sup>8</sup>).

**Appendix Table 7:** Initial and follow-up costs for each stage.

|            | Initial costs (€)<br>(includes diagnosis,<br>stadiation and surgery) | Follow-up/year for stable patients (€)<br>(includes follow-up exams<br>and medical therapy) |
|------------|----------------------------------------------------------------------|---------------------------------------------------------------------------------------------|
| 0          | 134                                                                  | 14                                                                                          |
| IA         | 1,809                                                                | 48                                                                                          |
| Regression | 1,990                                                                | 97                                                                                          |
| IB         | 1,946                                                                | 225                                                                                         |
| IIA        | 1,948                                                                | 347                                                                                         |
| IIB        | 2,430                                                                | 801                                                                                         |
| IIC        | 2,347                                                                | 1,830                                                                                       |
| III        | 7,816                                                                | 8,390                                                                                       |
| III TR     | 1,121                                                                | 35,992                                                                                      |
| IV         | 2,317                                                                | 63,436                                                                                      |
